1 Derivation and characterization of chimera-competent eXtra-Embryonic eNdoderm  
2 (XEN) cells from pig blastocysts

3  
4 Chi Park<sup>1,2,\*</sup>, Young Jeoung<sup>1,2</sup>, Jun Uh<sup>3</sup>, Kieun Park<sup>1,2,4</sup>, Jessica Bridge<sup>1,2</sup>, Anne  
5 Powell<sup>2,4</sup>, Jie Li<sup>5,6,7,8</sup>, Laramie Pence<sup>1,2</sup>, Tianbin Liu<sup>6,7,8</sup>, Hai-Xi Sun<sup>6,7,8</sup>, Ying Gu<sup>6,7,8</sup>, Yue  
6 Shen<sup>5,6,7,8,9</sup>, Jun Wu<sup>10,11</sup>, Juan-Carlos Izpisua Belmonte<sup>12,\*</sup>, and Bhanu P. Telugu<sup>1,2,4,\*</sup>

7  
8 <sup>1</sup>Animal and Avian Sciences, University of Maryland, College Park, MD 20742;

9 <sup>2</sup>Animal Bioscience and Biotechnology Laboratory, USDA, ARS, Beltsville, MD 20705;

10 <sup>3</sup>Department of Animal and Poultry Sciences, Virginia Polytechnic Institute and State  
11 University, Blacksburg, VA 24061;

12 <sup>4</sup>RenOVate Biosciences Inc, Reisterstown, MD 21136;

13 <sup>5</sup>BGI Education Center, University of Chinese Academy of Sciences, Shenzhen 518083,  
14 China

15 <sup>6</sup>BGI-Shenzhen, Shenzhen, 518083, China

16 <sup>7</sup>Guangdong Provincial Key Laboratory of Genome Read and Write, Shenzhen, 518120,  
17 China

18 <sup>8</sup>Guangdong Provincial Academician Workstation of BGI Synthetic Genomics, BGI-  
19 Shenzhen, Guangdong, China

20 <sup>9</sup>Shenzhen Engineering Laboratory for Innovative Molecular Diagnostics, Shenzhen,  
21 518120, China.

22 <sup>10</sup>Department of Molecular Biology, University of Texas Southwestern Medical Center,  
23 Dallas, TX 75390;

24 <sup>11</sup>Hamon Center for Regenerative Science and Medicine, University of Texas  
25 Southwestern Medical Center, Dallas, TX 75390

26 <sup>12</sup>Salk Institute, La Jolla, San Diego, CA 92037

27

28 **Keywords:** primitive endoderm, stem cell, chimera, XEN, SCNT

29

30

31 **\*Correspondence:** E-mail: [chpark@umd.edu](mailto:chpark@umd.edu); [belmonte@salk.edu](mailto:belmonte@salk.edu); and  
32 [btelugu@umd.edu](mailto:btelugu@umd.edu).

33

34 **Lead contact:** [btelugu@umd.edu](mailto:btelugu@umd.edu)

1 **Abstract**

2           We report for the first time, the derivation and characterization of extra-embryonic  
3 endoderm (XEN) cells from primitive endoderm (PrE) of porcine (p) embryos. The pXEN  
4 cells can be reliably and reproducibly generated from in vitro, in vivo and parthenote  
5 embryos, and expressed canonical PrE- and XEN-specific markers (*GATA4*, *GATA6*,  
6 *SOX17*, *SALL4*, *FOXA2*, and *HNF4A*). Transcriptome analysis of pXEN cells confirmed  
7 their XEN cell origin. When injected into blastocyst stage embryo, the pXEN cells  
8 contributed to wide-spread chimerism including visceral yolk sac, chorion, as well as  
9 embryonic gut and liver primordium in the fetus. The pXEN cells were shown to be an  
10 efficient nuclear donor for generating cloned offspring. Taken together, pXEN cells fulfill  
11 a longstanding need for a stable, chimera-competent, and nuclear transfer-compatible  
12 porcine embryonic cell line with applications for genome editing in livestock.

## 1 **Introduction**

2           In mammals, delamination of primitive endoderm (PrE) from the inner cell mass  
3 (ICM) in the late blastocyst-stage embryo marks the second fate specification event (the  
4 first being the separation of trophectoderm (TE) from the ICM). The PrE differentiate  
5 into visceral endoderm (VE) and parietal endoderm (PE) that line ICM and TE,  
6 respectively (Cockburn & Rossant, 2010). Together, the VE and PE generate the yolk  
7 sac, the first placental membrane. The yolk sac serves as the main placenta in rodents  
8 until mid-gestation (d11.5), and performs several important functions including providing  
9 nutritional support, gas exchange, hematopoiesis, and patterning cues to the developing  
10 embryo. However, in non-rodent species including pig and humans, the yolk sac is  
11 short-lived (Bauer *et al*, 1998; Carter, 2016). Regardless, in all species the PrE does not  
12 contribute to the embryonic endoderm, which emerges later following gastrulation  
13 (Kwon *et al*, 2008).

14           In culture, three types of stem cells can be established from the mouse embryo:  
15 embryonic stem cells (ESC) from the EPI, trophoblast stem cells (TSC) from TE, and  
16 XEN cells from PrE, which contribute to the embryo proper, the placenta, and the yolk  
17 sac, respectively (Rossant, 2008). The XEN cells can also be induced from ESC by  
18 overexpression of PrE-specific genes, *Gata-4, 6* (Fujikura *et al*, 2002; Wamaitha *et al*,  
19 2015), or *Sox17* (McDonald *et al*, 2014), or by treatment with growth factors (Cho *et al*,  
20 2012). More recently, naïve extraembryonic endodermal cells (nEnd) resembling the  
21 blastocyst-stage PrE-precursors have been developed from the authentic mouse ESC  
22 (Anderson *et al*, 2017). In rat, XEN cells established from blastocysts have different  
23 culture requirements and gene expression profiles compared to mouse XEN cells

1 (Debeb *et al*, 2009; Galat *et al*, 2009). While mouse XEN cells mainly contribute to the  
2 PE (Lin *et al*, 2016) in chimeras, rat XEN cells contribute to the VE (Galat *et al*, 2009). It  
3 is unclear whether XEN cells from non-rodent animals (human and pig) have potency  
4 similar to mouse or rat (Seguin *et al*, 2008). In this regard, the pig model can prove to  
5 be uniquely valuable in bridging the translational gap between rodents and humans.

6 Authentic ESC from pigs (p) have yet to be generated even after three decades  
7 of extensive investigation. The major reason for difficulties in the derivation of pESC is  
8 the instability of the pluripotent state (Alberio *et al*, 2010; Telugu *et al*, 2010). Even  
9 though derivation of pESC from EPI cells has proven to be difficult, extraembryonic  
10 (ExE) cells within the early blastocyst outgrowths grow rapidly and outnumber the EPI  
11 cells, which can often be misinterpreted as epiblast cells (Keefer *et al*, 2007). There are  
12 several reports describing pig EPI-like cells with properties similar to human ESC (Hou  
13 *et al*, 2016; Xue *et al*, 2016). However, these observations are purely conjectural, only  
14 fulfilling minimal criteria of pluripotency, and lacking the deterministic *in vivo*  
15 demonstration of pluripotency (Ramos-Ibeas *et al*, 2018; Xue *et al*, 2016). Besides ESC,  
16 attempts to establish TSC and XEN cells from pig or other domestic animals has  
17 received little attention, and requires more stringent assays to identify their potential  
18 (Ezashi *et al*, 2011; Shen *et al*, 2019).

19 Here we describe the establishment of XEN cells from the PrE of pig blastocysts.  
20 To-date these pXEN cells represent the only well characterized embryo-derived stem  
21 cell line that can be readily and reproducibly established under current culture  
22 conditions. The pXEN cells are stable in culture, undergo self-renewal for extended  
23 periods of time, contribute predominantly to the yolk sac and at a minor level to

- 1 embryonic endoderm (gut) in chimeras, and can serve as nuclear donors to generate
- 2 live offspring.

## 1 **Results**

### 2 **In vitro derivation and expansion of primary PrE outgrowths**

3 A central assumption behind the failure to establish pESC is a rapid loss of  
4 pluripotency in primary outgrowths (Alberio *et al*, 2010), however no details of lineage  
5 identities during the derivation phase have been given. We therefore aimed at clarifying  
6 cellular identity in the early blastocyst outgrowth. Whole blastocyst explants following  
7 attachment became flattened and spread out within 2 days of culture (Figure 1a). As  
8 primary outgrowths expanded, TE cells began to first emerge and then underwent  
9 dramatic morphological changes, becoming larger and flatter, and soon-after  
10 undergoing apoptosis (Figure 1a). After 5 days, a population of round and dispersed  
11 epithelial cells emerged as a discrete cell layer bordering the ICM (hereafter called  
12 “EPI”) cells (Figure 1a). The majority of EPI cells were SOX2 positive (18/21) but only a  
13 few co-expressed NANOG (4/21) (Figure 1b), similar to the staining pattern observed in  
14 the blastocyst (Figure 1c). Notably, the large round cells initially considered as TE cells,  
15 stained positive for GATA6 (9/12) and CK18 but lacked CDX2 expression (Figure 1b).  
16 The expression of GATA4, a later marker of the PrE, was also detected in few small  
17 round cells (4/7) (Appendix Figure s1a), confirming two distinct PrE progenitors  
18 expressing GATA factors in primary outgrowths. Of these subpopulations, small and  
19 large PrE were distinguishable based on cell morphology and by their expression of  
20 CK18 (Appendix Figure s1b). Although initial explants could be established from early  
21 blastocysts (day 5-6), late blastocysts (fully expanded or hatched, day 7-8) with  
22 discernable ICM and TE lineages (Figure 1c; Appendix Figure s1c), established stable  
23 PrE populations (Figure 1d and e) and were used further in our studies.

1           Initially, NANOG or GATA4 positive (+) cells were mostly undetectable, but  
2   cytoplasmic GATA4 expression appeared in the periphery of the early ICM outgrowths  
3   by day 3 of culture (Figure 1f). Intriguingly, NANOG/GATA4 co-positive cells that lined  
4   the side of EPI outgrowths gradually increased by 5 days, and by day 7, > 90% of  
5   GATA4+ cells co-expressed NANOG (Figure 1f). In contrast, the expression of NANOG  
6   was detected in few if any EPI cells, while the SOX2 expression was progressively  
7   decreased with time, indicating the loss of pluripotency (Appendix Figure 1d; Figure 1e  
8   and g). Besides GATA factors, SALL4 (Lim *et al*, 2008) a key stemness marker of XEN  
9   cells was expressed in the nuclei of PrE cells which had a small and compacted  
10   appearance. A large fraction (~75%) of SALL4+ cells had nuclear foci of intense histone  
11   3 lysine 27 trimethylation (H3K27me3), a hallmark of the inactive X in female  
12   outgrowths (Rugg-Gunn *et al*, 2010). Consistent with this observation, XIST levels were  
13   2-fold higher in SALL4+ PrE cells than in EPI cells (Figure 1i). This reflects the lineage  
14   specific dynamics of H3K27me3 accumulation on the X-chromosome, and could be the  
15   consequence of the co-expression of *SALL4* (Lim *et al*, 2008).

16

### 17   **Cellular properties and molecular signature of pig XEN cells**

18           Self-renewal of XEN cells is dependent on *Sall4* expression (Lim *et al*, 2008).  
19   The emergence of a distinct SALL4+ PrE population in primary outgrowths has  
20   prompted us to attempt derivation of pXEN cells. After 7-9 days of culture, PrE cells  
21   began to emerge in primary outgrowths and could be clearly demarcated based on their  
22   morphology and their easy dissociation from the EPI cells (Appendix Figure s2a). Both  
23   EPI and PrE colonies displayed a distinct morphology following serial passages (Figure

1 2a). Consistent with previous findings, the EPI colonies underwent spontaneous  
2 differentiation toward a fibroblast- or neuron-like appearance by passages 5-7. The  
3 colonies from PrE-derivatives, on the other hand, were more stable in culture. The  
4 colonies were propagated as flattened colonies and passaged as clumps by mechanical  
5 or enzymatic dissociation (Figure 2b), but did not survive passage as single cells, even  
6 when treated with ROCK inhibitor Y-27632 (Figure 2b; Appendix Figure s2b). Following  
7 sub-passage, the PrE colonies initially appeared as a homogenous colony of cells and  
8 grew as a monolayer. Upon serial passaging, two distinct populations emerged; a  
9 cobble-stone morphology in the center of the colony, and epithelial sheet-type cells at  
10 the borders of the colony (Appendix Figure s2c). The cells at the periphery were  
11 strongly alkaline phosphatase (ALP) positive (Figure 2c) and exhibited rapid  
12 proliferation as confirmed by PCNA staining (Appendix Figure s2c). The density of the  
13 feeder cells influenced the colony stability with the optimal densities ranging from 3- 4 x  
14  $10^4$  cells per  $\text{cm}^2$ . Lower feeder densities ( $< 2 \times 10^4$  cells/ $\text{cm}^2$ ) resulted in differentiation  
15 of cells with the expression of VIMENTIN (Figure 2d), and at high densities ( $>1 \times 10^5$   
16 cells/ $\text{cm}^2$ ) the cultures were more closely packed and showed reduced replating  
17 efficiency. The cells expressed PrE-specific markers (GATA4, GATA6, SOX17, SALL4,  
18 FOXA2, and HNF4A) with no expression of pluripotent markers (OCT4, SOX2, and  
19 NANOG) (Figure 2e; Appendix Figure s2e). Notably, NANOG was no longer detected  
20 upon passaging indicating a possible role for NANOG only in early PrE specification.  
21 While CDX2 is not detectable, other TE-markers EOMES and GATA3 were expressed,  
22 consistent with the role of the latter in endodermal specification. Taken together, the  
23 molecular signature confirmed the established colonies as XEN cells.



1           We tested the growth factor requirements of pXEN cells based on observations  
2 from mouse (Kunath *et al*, 2005). Withdrawal of either LIF, bFGF or both, had no impact  
3 on primary PrE induction. However, in the omission of both, the cells failed to expand  
4 into stable cell lines confirming the growth factor responsiveness (Figure 2f). The  
5 colonies that arose in LIF or FGF4 alone did not proliferate as rapidly as cells cultured  
6 with either bFGF, or both LIF and bFGF (Figure 2g). Omission of both growth factors  
7 resulted in a dramatic reduction in colony formation, with low expression of XEN marker  
8 genes *FOXA2*, *GATA4*, *GATA6*, *HNF4a*, *PDGFRa*, *SALL4* and *SOX17*, and high  
9 expression of VE- (*AFP* and *UPA*), and PE-genes, (*SNAIL*, *SPARC*, and *VIMENTIN*),  
10 consistent with spontaneous differentiation (Figure 2h). The XEN cells could be stably  
11 maintained in serum-free N2B27-based defined medium with lower degree of cellular  
12 differentiation and expression of VE- and PE-related genes, however this resulted in a  
13 longer cell doubling time (Appendix Figure s2f and g). One interesting finding is the  
14 presence of characteristic lipid droplets in the cytoplasm of pXEN cells (Figure 2a),  
15 which readily disappeared when plated in the absence of growth factors or feeder cells  
16 with a concomitant loss of *SALL4* expression, but no change in *EOMES* expression  
17 (Figure 2i). Although little is known about the mechanisms mediating the presence of  
18 lipid droplets, this feature could be leveraged as a non-invasive marker of *SALL4*+ cells.

19           Based on these preliminary trials, we established putative XEN cell lines from *in*  
20 *vivo*-developed (*vi*, n=4), *in vitro*-fertilized (*vf*, n=13), and parthenogenetically activated  
21 (*pg*, n=14) porcine blastocysts. All lines exhibited stable morphology and marker  
22 expression, irrespective of their embryonic origin (Figure 2j). The pXEN cells were  
23 maintained with proliferative potential in culture for extended passages (>50 passages),

1 and were karyotypically normal (Figure. 2k). After 5 days of hanging culture, static  
2 embryoid body structures were formed and expressed higher level of differentiated state  
3 VE and PE markers (Appendix Figure s2i). Transcriptomic analysis of pXEN cells  
4 expressed characteristic XEN cell repertoire and clustered closely with rodent XEN cells  
5 (Figure 2l, m, and n). Importantly, no teratoma development was observed in any  
6 recipient mice transplanted with  $1 \times 10^6$  to  $10^7$  cells from the six robust pXEN cell lines  
7 (Appendix Table s2) indicating that all injected pXEN cells were committed and not  
8 pluripotent cells.

9

## 10 **Contribution of pXEN Cells to Chimeras**

11 Mouse XEN cells contribute to PE, whereas rat XEN cells incorporate into both  
12 VE and PE lineages in chimeras (Galat *et al*, 2009; Kunath *et al*, 2005). Given these  
13 disparities, we evaluated the properties of pXEN cells in chimera studies (Figure 3a). To  
14 facilitate lineage tracing, we generated a transgenic pXEN reporter cell line by knocking-  
15 in a constitutive human UBC promoter driven GFP reporter downstream of the  
16 pCOL1A1 locus (hereafter, Tg-pCOL1A:GFP) using CRISPR/Cas9 system as  
17 previously described (Park *et al*, 2016) (Appendix Figure s3a). Labeled pXEN (Xnt  
18 pCOL1A:GFP #3-2) cells were injected as single cells or 5-10 cell clumps into  
19 parthenogenetic embryos at the morula (Day 4) or early blastocyst stages (Day 5). Cells  
20 injected as clumps integrated into host embryos more efficiently (77.3 to 85.7%) than  
21 individual cells (37.5 to 47.4%); and cells injected at the blastocyst stage showed better  
22 incorporation into ICM (85.7%) than when injected at the morula stage (77.3%)  
23 (Appendix Table s3). To evaluate *in vivo* chimeric development, pXEN cells were

1 similarly injected as clumps into host blastocysts (n=109). Following overnight culture,  
2 the resulting re-expanded blastocysts (n=94) were transferred into 3 recipient sows  
3 (Figure 3b). A total of 25 fetuses (27%) were retrieved from 2 recipients on day 21  
4 (Figure 2b). Among the recovered fetuses, the injected GFP<sup>+</sup> cells were found in the  
5 yolk sac (6/9) and the fetal membranes (5/9), and a small group of GFP<sup>+</sup> cells were  
6 observed in one embryo (1/9) (Figure 3b). Notably, GFP<sup>+</sup> cells extensively contributed  
7 to the yolk sac in two chimeras (XeC#2-3 and XeC#2-4) with a moderate signal in the  
8 allantochorion (Figure 3c). The GFP<sup>+</sup> cells observed in embryos were from pXEN cells  
9 and not due to auto-fluorescence as confirmed by genomic PCR. Quantification of GFP<sup>+</sup>  
10 cells by qPCR confirmed XEN cell chimerism at 1.7% in 2 embryos, and at 12.9% in the  
11 yolk sac, and 8% in the allantochorion, signifying active integration and proliferation of  
12 pXEN cells during embryogenesis (Figure 3d). As shown in Fig. 3e, immunostaining  
13 with the anti-GFP antibody identified GFP<sup>+</sup> cells in the embryonic gut of 3 chimeric  
14 fetuses (XeC#1-2, XeC #2-3, and XeC #2-6). The GFP<sup>+</sup> donor cell population integrated  
15 predominantly into the visceral endodermal layers, but rarely into the outer mesothelial  
16 layers or endothelial cells in the yolk sac (Figure 3e middle; Appendix Figure s3c), and  
17 to a minor extent populated amnion, allantois, chorion (Figure 3e; Appendix Figure s3d),  
18 and gut endoderm (Appendix Table s5). Overall, the chimerism frequency of the pXEN  
19 cells was rather high (60%).

20

## 21 **Generation of viable cloned offspring from pXEN cells via SCNT**

22 In an effort to test the utility of pXEN cells as nuclear donors, we performed  
23 SCNT with the pXEN cells used in the chimera assay (above), alongside previously

1 published crossbred knock-out fetal fibroblasts (FF<sup>NGN3<sup>-/-</sup></sup>) as controls (Sheets *et al*,  
2 2018). A total of 222 cloned embryos reconstituted from pXEN (n=61) and FF (n=161)  
3 were co-transferred into two surrogate gilts to exclude confounding variables associated  
4 with recipient animals affecting the outcome. Following embryo transfers, one  
5 pregnancy was established, and 8 cloned piglets were delivered at term. Three of the 8  
6 piglets were GFP positive and black coated (4.9%) confirming the COL1A:GFP  
7 Ossabaw XEN cell origin, while 5 piglets were white coated and GFP negative and  
8 therefore from the control fibroblasts (3.1%) (Figure 4a). As expected, the piglets  
9 exhibited ubiquitous expression of GFP in all tissues (Figure 4b). The genotype of the  
10 offspring was confirmed by PCR (Figure. 4c). In addition to this, we performed multiple  
11 rounds of SCNT with FF<sup>pCOL1A:GFP</sup> (#3) from which the XEN cells were derived. Despite  
12 being genetically identical, no offspring were obtained from founder GFP fibroblasts, but  
13 the XEN cells derived from fibroblasts served as efficient donors in SCNT.

## 1 **Discussion**

2           Despite all efforts made so far, establishment of embryo-derived stem cells  
3 without major chemical intervention in pigs has largely been unsuccessful. As shown by  
4 multiple groups, the EPI fraction of primary explants fails to proliferate, and the cultures  
5 are rapidly overtaken by proliferating ExE cells. That said, there were no published  
6 reports that temporally followed the fate of the ExE derived lines in culture, nor have  
7 they been adequately characterized. However, the equivalent lines from mouse have  
8 been thoroughly characterized. This report for the first time takes a systematic and in-  
9 depth look at the derivation, establishment, and characterization of XEN cells from PrE.

10           During early mouse embryo development, NANOG is expressed in EPI cells and  
11 excluded from GATA4<sup>+</sup> PrE cells in embryo (Chazaud *et al*, 2006; Plusa *et al*, 2008).  
12 This seems counterintuitive given the mutual antagonism between NANOG and GATA4  
13 that facilitates key cell-fate decisions between EPI and PrE, respectively (Mitsui *et al*,  
14 2003). Indeed, several lines of evidence support the expression of NANOG in pig  
15 hypoblast (Gao *et al*, 2011; Kobayashi *et al*, 2017), which is contrary to the mouse  
16 model. Emergence of the PrE population with co-expression of GATA4/NANOG  
17 appears to represent an early step in PrE specification, highlighting mechanistic  
18 differences in early lineage specification between mouse and pig. That said, the  
19 establishment of pXEN cells, their culture characteristics, and the resulting molecular  
20 signatures (including high expression of *FOXA2*, *GATA4*, *GATA6*, *HNF4a*, *PDGFRa*,  
21 *SALL4* and *SOX17*) are shared with rodent models, with the exception of failure to  
22 establish XEN cells in FGF4-based medium, and intolerance to dispersal as single cells.  
23           Generation of embryonic chimeras has been considered the most stringent test

1 of stem cell differentiation potential *in vivo* (Mascetti & Pedersen, 2016). This study  
2 demonstrates that despite the lack of pESC, it is possible to generate embryo-derived  
3 stem cell lines with PrE-like properties as confirmed by lineage-restricted plasticity in the  
4 resulting chimeras, which were not irrevocably fixed (e.g., yolk sac, placenta, gut  
5 endoderm) (Kwon *et al*, 2008). This indicates that the pXEN cells are in a less  
6 committed endodermal naïve state. In the pig, freshly isolated ICMs are capable of  
7 widespread tissue contribution, including germline colonization in chimeras (Nagashima  
8 *et al*, 2004). Despite this, the pluripotent EPI or iPS cells were preferentially engrafted  
9 into extraembryonic tissues (Ezashi *et al*, 2011; Fujishiro *et al*, 2013; West *et al*, 2010).  
10 It is likely that in the absence of defined conditions, embryonic outgrowths are unstable  
11 and transition to a XEN-like state (Zhao *et al*, 2015). Future chimera trials will be  
12 performed in embryos that lack key gate-keeper genes (for e.g., SALL4), where the  
13 relative contribution of pXEN cells to embryonic and ExE endodermal lineages are  
14 expected to be higher when compared to current experiments performed with wild type  
15 embryos.

16 *In vivo* generation of human organs via interspecies chimeras between human  
17 and pigs via blastocyst complementation has been acknowledged as a source of donor  
18 organs for life-saving regenerative medicine applications (Kobayashi *et al*, 2010;  
19 Matsunari *et al*, 2013; Wu *et al*, 2017). Evidence gathered in the present study  
20 demonstrates the engraftment potential of pXEN cells with lineage restricted cell fate.  
21 When such experiments are performed with human XEN cells, the potential contribution  
22 to endodermal organs will provide an on-demand source of human endodermal cells in  
23 pig hosts. Our present findings make the use of pXEN cells a particularly attractive

1 choice to generate tissue-specific chimeras for endodermal organs, while limiting  
2 unwanted contribution to undesirable organs (e.g., germ cell or neural lineage) in  
3 interspecies chimeras- a likely outcome with the use of ESC/iPS cells (Masaki *et al*,  
4 2016; Rashid *et al*, 2014).

5 Another advantage of the pXEN cells is the competency to generate live animals  
6 via SCNT. This is especially attractive in complex genome editing and genetic  
7 engineering applications where a long-life span in culture is desirable. As evidenced  
8 from this study, genetically modified fibroblast cells failed to generate live offspring,  
9 whereas, the pXEN cells derived following cloning of the FFs were able to generate live  
10 offspring at a relatively high efficiency (4.9%). One potential explanation is the  
11 epigenetic disruption caused by transfection that may have compromised embryonic  
12 development. It's possible that the pXEN cell derivation process resets the genome to a  
13 state that allows full-term development. It remains to be seen if this could be applicable  
14 to other cells which fail to generate live offspring. Taken together, we argue that the  
15 derivation of pXEN cells fulfils a longstanding need in the livestock genetics field for a  
16 stem cell line of embryonic origin that can be reliably and reproducibly generated, are  
17 stable in culture, have the potential to contribute to chimeras, and are a good source for  
18 creating cloned animals.  
19

## 1 **Methods**

### 2 **Experimental Animal Assurance**

3 All experiments involving live animals were performed in accordance with the approved  
4 guidelines of the Beltsville ARS and Thomas D. Morris Inc., Institutional Animal Care  
5 and Use Committee (IACUC). All experimental protocols involving live animals were  
6 approved by the IACUC committee.

### 7 **Establishment and maintenance of pig XEN cells**

8 All chemicals were purchased from Sigma-Aldrich (St. Louis, MO), unless noted  
9 otherwise. Embryonic explants and XEN cells were cultured on a feeder layer of early  
10 passage (n=3) CF-1 mouse embryonic fibroblasts (MEF) cells mitotically inactivated by  
11 treatment with mitomycin-C (3 hr, 10 µg/mL). A day before seeding the embryos or XEN  
12 cells, the feeders were plated in MEF medium based on high-glucose Dulbecco's  
13 modified Eagle medium (DMEM; Gibco, Grand Island, NY) supplemented with 10% (v/v)  
14 fetal bovine serum (FBS; HyClone Laboratories Inc., Logan UT, USA) on 0.1% (v/v)  
15 gelatin-coated four-well plates (Nunclon, Roskilde, Denmark) at a density of  $3-5 \times 10^5$   
16 cells per cm<sup>2</sup>. At least 2 hr before the start of the experiment, the MEF medium was  
17 aspirated and replaced with 'standard ES medium' which included DMEM/ Nutrient  
18 Mixture Ham's F12 (DMEM/F-12; Gibco) supplemented with 15% ES-qualified fetal calf  
19 serum (FCS; HyClone Laboratories Inc.), 1 mM sodium pyruvate, 2 mM L-glutamine,  
20 100 units/mL penicillin-streptomycin, 0.1 mM 2-β-mercaptoethanol, 1% non-essential  
21 amino acids (NEAA; all from Gibco), with various combination of growth factors; 10  
22 ng/mL human recombinant leukemia inhibitory factor (hrLIF; Milipore, Bedford, MA) and  
23 10 ng/mL human recombinant basic fibroblast growth factor (hrbFGF; R&D Systems,



1 Minneapolis, MN). Other media combinations that were tested include RPMI 1640 or  
2 N2B27 serum free medium (1:1 ratio of DMEM/F12 and Neurobasal medium plus N2  
3 and B27, all from Gibco), with a combination of 5 ng/mL LIF and/or 10 ng/mL bFGF, or  
4 25 ng/mL human recombinant fibroblast growth factor 4 (hrFGF4; R&D Systems) and 1  
5  $\mu\text{g/mL}$  heparin (Niakan *et al*, 2013). Following initial plating, attachment and outgrowth  
6 development, the medium was refreshed on d 3, followed by media exchange every 2  
7 days. After 7-8 days of culture, the primary outgrowths were mechanically dissociated  
8 into small clumps, and transferred onto fresh feeders for passaging. The pXEN cells  
9 were cultured at 38.5°C in 5% O<sub>2</sub> and 5% CO<sub>2</sub>, with the culture medium being refreshed  
10 every other day and passaged at 1:20 every 7-8 days. Cells were passaged as clumps  
11 by gentle pipetting following 10 min digestion with Accutase (Gibco). Before routine  
12 passaging and freezing, cells were cultured with Rho Kinase (ROCK) inhibitor Y-27632  
13 (10  $\mu\text{M}$ ; StemCell Technologies, Vancouver, Canada) at least 2 hr prior to dissociation  
14 (Watanabe *et al*, 2007). Each XEN cell line was frozen in FBS based medium  
15 supplemented with 8% (v/v) DMSO and recovered with high viability. In order to  
16 determine chromosomal stability in long term culture, cytogenetic analysis was  
17 performed by Cell Line Genetics.

18

### 19 **Alkaline phosphatase staining**

20 The cells were fixed with 4% (w/v) paraformaldehyde for 3 min at room temperature (RT)  
21 and were washed three times with DPBS. Alkaline phosphatase (ALP) staining was  
22 performed with a BCIP/NBT Alkaline Phosphatase Color Development Kit following the  
23 manufacturer's instructions. The cells were examined using an inverted microscope.

1 ***In vitro* differentiation of XEN cells into parietal or visceral endoderm:**

2 The pXEN cells were differentiated by means of embryoid body (EB) formation as  
3 previously described (Chuykin *et al*, 2013). pXEN cells were dissociated as clumps,  
4 washed, and resuspended in medium (DMEM/F12 plus 15% FBS) as hanging drops on  
5 the lid of a 60 mm dish, and cultured for 5 days, during which time spheroids were  
6 formed.

7 **Methods for embryo production and manipulation**

8 The *in vivo* and *in vitro* embryo production were performed as described previously  
9 (Park *et al*, 2016; Sheets *et al*, 2018). For generating parthenote, *in vitro* fertilized  
10 embryos, and for performing somatic cell nuclear transfer (SCNT), cumulus-oocyte  
11 complexes were purchased from a commercial supplier (DeSoto Biosciences, Seymour,  
12 TN, USA). After *in vitro* maturation, the cumulus cells were removed from the oocytes  
13 by gentle pipetting in a 0.1% (w/v) hyaluronidase solution. Briefly, for *In vitro* fertilization  
14 (IVF), pre-diluted fresh semen (Duroc; Progenes) was centrifuged twice at 200 g for 3  
15 min in DPBS containing 0.2% BSA. The sperm pellet was adjusted to a concentration of  
16  $2 \times 10^5$  sperm per mL and co-incubated with matured oocytes in modified Tris-buffered  
17 medium containing 0.4% BSA for 5 hr in a humidified atmosphere (5% CO<sub>2</sub> in air).  
18 Following three washes, putative zygotes were cultured and maintained in PZM3  
19 medium in a low oxygen air (5% O<sub>2</sub> and 5% CO<sub>2</sub> in air). For obtaining *in vivo* embryos,  
20 donor animals were synchronized using Regumate and artificially inseminated at 12 and  
21 24 hr following the observation of first standing estrus. On days 5-7 post-insemination,  
22 *in vivo* embryos were recovered by flushing oviduct with 35 ml of TL-Hepes buffer  
23 containing 2% BSA under general anesthesia. For SCNT, fetal fibroblasts (FF) were

1 synchronized to the G1/G0-phase by serum deprivation (DMEM with 0.2% FCS) for 96  
2 hr, and pXEN cells were mitotically arrested by serum free medium (N2B27 with 1%  
3 BSA) for 48 hr followed by incubation with aphidicolin (0.1  $\mu$ M) for 12 hr. Enucleation  
4 was performed by aspirating the polar body and the MII metaphase plates using a  
5 micropipette (Humagen, Charlottesville, VA, USA) in 0.1% DPBS supplemented with 5  
6  $\mu$ g/mL of cytochalasin B. After enucleation, donor cells were placed into the perivitelline  
7 space of an enucleated oocyte. Fusion of cell–oocyte couplets was induced by applying  
8 two direct current (DC) pulses (1-sec interval) of 2.1 kV/cm for 30  $\mu$ s using a ECM 2001  
9 Electroporation System (BTX, Holliston, MA). After fusion, the reconstituted oocytes  
10 were activated by a DC pulse of 1.2 kV/cm for 60  $\mu$ s, followed by post-activation in 2  
11 mM 6-dimethylaminopurine for 3 hr. After overnight culture in PZM3 with a histone  
12 deacetylase inhibitor Scriptaid (0.5  $\mu$ M), the cloned embryos were surgically transferred  
13 into the oviduct. Parthenogenetic embryos were produced by the activation procedures  
14 used for SCNT.

### 15 **Embryo Transfer**

16 The surrogate recipients were synchronized by oral administration of progesterone  
17 analog Regumate for 14-16 days. Animals in natural estrus on the day of surgery were  
18 used as recipients for SCNT embryo transfers (into oviduct), and at days 5-6 after  
19 natural heat were used for blastocyst transfer (into uterus) for generating chimeras.  
20 Surgical procedure was performed under a 5% isoflurane general anesthesia following  
21 induction with TKX (Telazol 100 mg/kg, ketamine 50 mg/kg, and xylazine 50 mg/kg  
22 body weight) administered intramuscularly. Pregnancies were confirmed by ultrasound

1 on day 27 following transfer. Cloned piglets were delivered at day 117 of pregnancy by  
2 natural parturition.

### 3 **RNA and DNA preparations**

4 For isolation of genomic DNA (gDNA) from cells and tissues, the QIAamp mini DNA Kit  
5 (Qiagen, Valencia, CA, USA) was used according to the manufacturers' instructions.

6 Total RNA was isolated using Trizol plus RNeasy mini kit (Qiagen) and mRNA from  
7 individual blastocysts was extracted using the Dynabeads mRNA Direct Kit (DynaLabs,  
8 Oslo, Norway). Synthesis of cDNA was performed using a High Capacity cDNA  
9 Reverse transcription kit (Applied Biosystems; ABI, Foster City, CA) according to the  
10 manufacturers' instructions. The QIAseq FX Single Cell RNA Library kit (Qiagen) was  
11 used for Illumina library preparation and transcriptomics analysis.

12 **qPCR:** Relative quantification of mRNA levels was carried out using SYBR Green  
13 technology on an ABI 7500 Fast Real-Time PCR system (Applied Biosystems). The  
14 thermal-cycling conditions are: 20 s at 95°C followed by 40 cycles of 3 s at 95°C and 30  
15 s at 60°C. The primers were designed to yield a single product without primer  
16 dimerization. The amplification curves for the selected genes were parallel. All reactions  
17 were performed from three independent biological and two technical replicates. Two  
18 reference genes, ACTB and YWHAG were used to normalize all samples and the  
19 relative expression ratios were calculated via the  $2^{-\Delta\Delta Ct}$  method (Livak & Schmittgen,  
20 2001). The primers used in qPCR are listed in Appendix Table s1.

### 21 **Data access**

22 A total of 12 RNA-seq data sets generated in this study have been deposited in the  
23 CNSA (<https://db.cngb.org/cnsa/>) of CNGBdb with accession code CNP0000388, and

1 also NCBI Gene Expression Omnibus (GEO; <http://www.ncbi.nlm.nih.gov/geo>) under  
2 accession number GSE128149.

### 3 **Transcriptomics Analysis**

4 RNA-seq reads were mapped to the pig reference genome (Sscrofa11.1) using  
5 HISAT2(Kim *et al*, 2015) (version 2.0.4) with parameters “hisat2 --sensitive --no-  
6 discordant --no-mixed -l 1 -X 1000” and to the reference cDNA sequence using Bowtie2  
7 (Langmead *et al*, 2009) with parameters “bowtie2 -q --sensitive --dpad0 --gbar  
8 99999999 --mp 1,1 --np 1 --score-min L,0,-0.1 -l 1 -X 1000 --no-mixed --no-discordant-p  
9 1 -k 200”. Then the expression levels of each gene were calculated by the fragments  
10 per kilobase of exons per million fragments mapped (FPKM) using RSEM (Li & Dewey,  
11 2011) with parameters “rsemcalculate-expression --paired-end -p 8” based on the result  
12 of Bowtie2. The data of mouse and rat XEN cells were downloaded from GSE106158  
13 (Zhong *et al*, 2018) (mouse: GSM2830587, GSM2830588 and GSM2830589; rat:  
14 GSM2830591, GSM2830592 and GSM2830593) and the gene expression levels were  
15 calculated in the same way (the mouse and rat reference genome used were  
16 GRCm38.p6 and Rnor\_6.0, respectively). The expression levels of mouse nEnd were  
17 downloaded from GSE10742 (Song *et al*, 2008) (GSM271163, GSM271164 and  
18 GSM271165). Then the expression levels of all samples were combined to obtain the  
19 expression matrix. Final expression matrix was calculated by cross-species gene  
20 expression analysis as reported previously (Gafni *et al*, 2013). The expression values  
21 from mouse, rat and pig were transformed separately into relative abundance values:  
22 for each gene, the relative abundance value is the expression value divided by the  
23 mean of expression values within the same gene across samples in the same species.

1 The final expression matrix was subjected to hierarchical clustering using R software.  
2 Development stage (PE, PrE, TE, VE and EPI)-specific genes were selected to do the  
3 subsequent analyses. They were mapped to the final expression matrix to do the PCA  
4 and heatmap analysis with R software.

### 5 **Immunofluorescence and Immunohistochemical analysis**

6 The embryos, explants and derived pXEN cell lines (Xvv#9 and Xnt pCOL1A:GFP#3-2)  
7 have been characterized by staining for markers by immunofluorescence (IF) analyses.  
8 Samples were fixed with 4% (w/v) paraformaldehyde for 5 min, then washed with DPBS.  
9 The sections were permeabilized in DPBS containing 0.01% Triton X-100 (PBT) for 20  
10 min, blocked in blocking solution (10% FBS and 0.05% Triton X-100 in DPBS) for 1 hr,  
11 and then incubated with primary antibodies overnight at 4°C. The following day, the  
12 sections were washed three times in PBT, followed by incubation in the blocking  
13 solution with fluorescence labelled secondary antibodies (Alexa Fluor 488 (1: 500)  
14 and/or Alexa Fluor 568 (1:500) against primary antibody host species) for 1 hr. The cell  
15 nuclei were stained with DAPI (Life Technologies) for 5 min in the dark at RT. For  
16 Immunohistochemistry, representative samples from the chimeric fetuses including fetal  
17 membranes were fixed with 4% formalin overnight at 4°C. Serial paraffin sections were  
18 prepared by American Histolabs Inc. (Gaithersburg, MD) and stained with hemotaxyl  
19 and eosin to serve as a reference. Immunostaining was subjected to heat-induced  
20 antigen retrieval at 95-98 °C for 20 min in Tris EDTA buffer (pH 9.0, 0.05%Tween20),  
21 cooled at RT for 20 min, permeabilized in DPBS containing 0.01% Triton X-100 (PBT)  
22 for 20 min, blocked using Super Block blocking buffer (Thermo Fisher Scientific,  
23 Waltham, MA, USA) for 30 min at RT, and incubated with primary and secondary

1 antibodies and stained using process described above. GFP antibody and IHC  
2 protocols were validated with the tissues from a female XEN cloned pig (Xnt clone #1)  
3 prior to use in chimera testing. For immunofluorescence and immunohistochemistry,  
4 negative control slides, without primary antibody, were included for each experiment to  
5 establish background staining. Imaging was performed using an inverted fluorescent  
6 microscope (Nikon Eclipse N2000). The source of antibodies used in the experiments  
7 were listed in Appendix Table s1.

### 8 **Generating of a GFP-KI reporter.**

9 In order to establish green fluorescent protein (GFP) gene-based reporter XEN cell line,  
10 we used a site-specific knock in (KI) Ossabaw fetal fibroblasts. In order to facilitate KI at  
11 high frequencies, we have used a combination of small molecule inhibitor of NHEJ  
12 pathway (SCR7) (Maruyama *et al*, 2015) and a pre-complexed Cas9 protein and sgRNA  
13 RNP complex to KI a ubiquitous promoter (UBC) driven GFP (Sanger Institute)  
14 downstream of a ubiquitously expressed *COL1A1* locus to ensure stable expression of  
15 transgenes. After a day of transfection, the GFP-positive (GFP<sup>+</sup>) cells were sorted by  
16 flow cytometry (Becton Dickinson, Franklin Lakes, NJ, USA) and GFP<sup>+</sup> single cells were  
17 replated into wells of a 96-well plate for expansion. After 10–15 days, individual colonies  
18 were washed, suspended in 20  $\mu$ L of lysis buffer (50mM KCl, 1.5mM MgCl<sub>2</sub>, 10mM Tris  
19 pH 8.0, 0.5% NP-40, 0.5% Tween-20 and 100  $\mu$ g/mL proteinase K) and incubated for 1  
20 h at 65°C followed by heating the mixture at 95°C for 10 min to inactivate the enzymes.  
21 The cell lysates (2  $\mu$ L) were directly used as a template for PCR with screening primers  
22 (Appendix Table s1). Using this approach, we have identified >60% of the clonal lines  
23 showing stable integration of the transgene. The targeted-clones with a strong and

1 consistent fluorescence intensity as determined by fluorescence microscopy were  
2 frozen in 92% FCS and 8% DMSO, prior to use as nuclear donor cells. Using labeled  
3 XEN cells, live animals were generated by SCNT.

#### 4 **Chimera assay**

5 For lineage tracing of injected XEN cells, a total of eight reporter XEN cell lines were  
6 established from cloned blastocysts (Day 7 to 8), using GFP KI fetal fibroblasts  
7 (pCOL1A-GFP #3 and #6). A candidate female XEN cell line (Xnt pCOL1A:GFP#3-2)  
8 with stable expression of GFP and XEN markers was used for chimera testing. The  
9 cells were pre-treated with Rho Kinase (ROCK) inhibitor Y-27632 (10  $\mu$ M; StemCell  
10 Technologies) for 2 hr and dissociated with Accutase at 38.5 °C for 5 min followed by  
11 gentle pipetting. About 3-4 small clumps (10–15 cells) were injected per blastocyst  
12 (Appendix Figure s3b). After 20~24 hr of culture, injected blastocysts (n=94) were  
13 surgically transferred into the upper part of each uterine horn through needle puncture  
14 in recipients at days 5–6 of the estrous cycle (D0=onset of estrus; n=3). On day 15 after  
15 embryo transfer, the surrogate animals were euthanized to recover XEN-chimeras (XeC;  
16 embryonic day 21). A total of 25 fetuses were obtained after transfer and assessed  
17 macroscopically for viability and GFP expression. Fetuses that showed strong GFP  
18 expression in yolk sac (XeC#3-4) were cut sagittally; one half was used for histological  
19 analysis, whereas the second for DNA extraction. For detecting chimera contribution,  
20 gDNA were extracted from three parts of embryos: a small pieces of tissue at the  
21 posterior region of the fetus, yolk sac, and allantochorionic membrane. Embryos that  
22 were malformed or noticeably delayed (i.e. spherical and ovoid) were used only for  
23 gDNA isolation. The gDNA samples were subjected to PCR for chimera detection with



1 genotyping primers (Appendix Table s1), and qPCR was performed for the detection of  
2 knock-in allele and chimerism rate. Prior to use in the qPCR analysis, the dynamic  
3 range of qPCR primers were validated (amplification efficiency >90%). The GFP labeled  
4 pXEN cell line (Xnt pCOL1A:GFP #3-2) was used as a positive control (GFP<sup>+</sup>, 100%)  
5 and a non-GFP XEN cell from parthenote embryo (Xpg#1) served as a negative (GFP<sup>-</sup>,  
6 0%) control for investigating % chimerism. Relative expression was calculated using the  
7 comparative  $2^{-\Delta\Delta Ct}$  method. qPCR was performed in triplicate. Cycling conditions for  
8 both GFP and reference (ACTB and YWHAZ gene) products were 10 min at 95°C,  
9 followed by 40 cycles of 95°C for 15 sec, and 60°C for 1 min. The primers used in qPCR  
10 are listed in Appendix Table s1.

### 11 **Teratoma Assay**

12 Immunodeficient-nude (BRG, BALB/c-Rag2<sup>null</sup> IL2rg<sup>null</sup>; Taconic) and -scid (NIH-III,  
13 Cr:NIH-bgnu-Xid; National Cancer Institute) male mice were used to perform teratoma  
14 formation assay. Before transplanting, the pXEN cells were incubated for 2 hr in  
15 DMEM/F12 supplemented with Y27632 (10 μM). The cells were dissociated  
16 mechanically into small clumps, washed and suspended in 0.2 mL of mixture containing  
17 equal volumes of DMEM/F12 and Matrigel (Corning, MA, USA)(Prokhorova *et al*, 2009).  
18 With six pXEN cell lines, the cell suspensions (1 to 10 × 10<sup>6</sup> cells) were subcutaneously  
19 injected into 6-8-week-old mice (Appendix Table s2). Mice were housed in specific  
20 pathogen-free conditions and were monitored for a minimum of 30 weeks.

### 21 **Statistical analysis**

22 Statistical analysis was performed with GraphPad Prism 6 (GraphPad Software, Inc.,  
23 San Diego, CA, USA) using two-way analysis of variances (ANOVA) and Tukey's

- 1 multiple comparison test at 5% level of significance. Data were presented as mean  $\pm$
- 2 SD.
- 3

1 **Acknowledgements:** This research was supported by AFRI Grants# 2015-67015-  
2 22845 and 2018-67015-27575 from the USDA National Institute of Food and Agriculture,  
3 and 1 R01 HD092304-01A1 from NICHD, NIH to BT; Guangdong Provincial Key  
4 Laboratory of Genome Read and Write (No. 2017B030301011), Guangdong Provincial  
5 Academician Workstation of BGI Synthetic Genomics (No. 2017B090904014),  
6 Shenzhen Engineering Laboratory for Innovative Molecular Diagnostics (DRC-  
7 SZ[2016]884) and Shenzhen Peacock Plan (No.. KQTD20150330171505310)

8  
9 **Author Contributions:** CP, JCB and BT conceived the project and designed the  
10 experiments; CP, YJ, YU and JB established and performed characterization of  
11 embryonic outgrowths and XEN cells; KP and AP performed the knockin and generated  
12 the GFP reporter lines used for generating GFP:XEN cells used in chimera experiments;  
13 CP, JL, LP, TL, JS, YG, YS, JW generated the libraries and transcriptomic analysis; CP  
14 and BT wrote the initial draft, CP, JW, JCB and BT revised the manuscript based on the  
15 input from all authors. All authors approved final draft for submission.

16  
17 **Competing Interests:** KP, AP and BT serve as consultants at RenOVAtе Biosciences  
18 Inc, (RBI). BT is the founding member of RBI. All remaining authors declare no  
19 competing or conflicts of interest.

1 **References:**

- 2
- 3 Alberio R, Croxall N, Allegrucci C (2010) Pig epiblast stem cells depend on activin/nodal  
4 signaling for pluripotency and self-renewal. *Stem Cells Dev* 19: 1627-36
- 5 Anderson KGV, Hamilton WB, Roske FV, Azad A, Knudsen TE, Canham MA, Forrester LM,  
6 Brickman JM (2017) Insulin fine-tunes self-renewal pathways governing naive pluripotency and  
7 extra-embryonic endoderm. *Nat Cell Biol* 19: 1164-1177
- 8 Bauer MK, Harding JE, Bassett NS, Breier BH, Oliver MH, Gallaher BH, Evans PC, Woodall  
9 SM, Gluckman PD (1998) Fetal growth and placental function. *Mol Cell Endocrinol* 140: 115-20
- 10 Carter AM (2016) IFPA Senior Award Lecture: Mammalian fetal membranes. *Placenta* 48 Suppl  
11 1: S21-S30
- 12 Chazaud C, Yamanaka Y, Pawson T, Rossant J (2006) Early lineage segregation between  
13 epiblast and primitive endoderm in mouse blastocysts through the Grb2-MAPK pathway. *Dev*  
14 *Cell* 10: 615-24
- 15 Cho LT, Wamaitha SE, Tsai IJ, Artus J, Sherwood RI, Pedersen RA, Hadjantonakis AK, Niakan  
16 KK (2012) Conversion from mouse embryonic to extra-embryonic endoderm stem cells reveals  
17 distinct differentiation capacities of pluripotent stem cell states. *Development* 139: 2866-77
- 18 Chuykin I, Schulz H, Guan K, Bader M (2013) Activation of the PTHRP/adenylate cyclase  
19 pathway promotes differentiation of rat XEN cells into parietal endoderm, whereas Wnt/beta-  
20 catenin signaling promotes differentiation into visceral endoderm. *J Cell Sci* 126: 128-38
- 21 Cockburn K, Rossant J (2010) Making the blastocyst: lessons from the mouse. *J Clin Invest* 120:  
22 995-1003
- 23 Debeb BG, Galat V, Epple-Farmer J, Iannaccone S, Woodward WA, Bader M, Iannaccone P,  
24 Binas B (2009) Isolation of Oct4-expressing extraembryonic endoderm precursor cell lines.  
25 *PLoS ONE* 4: e7216
- 26 Ezashi T, Matsuyama H, Telugu BP, Roberts RM (2011) Generation of colonies of induced  
27 trophoblast cells during standard reprogramming of porcine fibroblasts to induced pluripotent  
28 stem cells. *Biol Reprod* 85: 779-87
- 29 Fujikura J, Yamato E, Yonemura S, Hosoda K, Masui S, Nakao K, Miyazaki Ji J, Niwa H (2002)  
30 Differentiation of embryonic stem cells is induced by GATA factors. *Genes Dev* 16: 784-9
- 31 Fujishiro SH, Nakano K, Mizukami Y, Azami T, Arai Y, Matsunari H, Ishino R, Nishimura T,  
32 Watanabe M, Abe T, Furukawa Y, Umeyama K, Yamanaka S, Ema M, Nagashima H, Hanazono  
33 Y (2013) Generation of naive-like porcine-induced pluripotent stem cells capable of contributing  
34 to embryonic and fetal development. *Stem Cells Dev* 22: 473-82
- 35 Gafni O, Weinberger L, Mansour AA, Manor YS, Chomsky E, Ben-Yosef D, Kalma Y, Viukov  
36 S, Maza I, Zviran A *et al* (2013) Derivation of novel human ground state naive pluripotent stem  
37 cells. *Nature* 504: 282-6
- 38 Galat V, Binas B, Iannaccone S, Postovit LM, Debeb BG, Iannaccone P (2009) Developmental  
39 potential of rat extraembryonic stem cells. *Stem Cells Dev* 18: 1309-18

- 1 Gao Y, Jammes H, Rasmussen MA, Oestrup O, Beaujean N, Hall V, Hyttel P (2011) Epigenetic  
2 regulation of gene expression in porcine epiblast, hypoblast, trophectoderm and epiblast-derived  
3 neural progenitor cells. *Epigenetics* 6: 1149-61
- 4 Hou DR, Jin Y, Nie XW, Zhang ML, Ta N, Zhao LH, Yang N, Chen Y, Wu ZQ, Jiang HB, Li  
5 YR, Sun QY, Dai YF, Li RF (2016) Derivation of Porcine Embryonic Stem-Like Cells from In  
6 Vitro-Produced Blastocyst-Stage Embryos. *Scientific reports* 6: 25838
- 7 Keefer CL, Pant D, Blomberg L, Talbot NC (2007) Challenges and prospects for the  
8 establishment of embryonic stem cell lines of domesticated ungulates. *Anim Reprod Sci* 98: 147-  
9 68
- 10 Kim D, Langmead B, Salzberg SL (2015) HISAT: a fast spliced aligner with low memory  
11 requirements. *Nat Methods* 12: 357-60
- 12 Kobayashi T, Yamaguchi T, Hamanaka S, Kato-Itoh M, Yamazaki Y, Ibata M, Sato H, Lee YS,  
13 Usui J, Knisely AS, Hirabayashi M, Nakauchi H (2010) Generation of rat pancreas in mouse by  
14 interspecific blastocyst injection of pluripotent stem cells. *Cell* 142: 787-99
- 15 Kobayashi T, Zhang H, Tang WWC, Irie N, Withey S, Klisch D, Sybirna A, Dietmann S,  
16 Contreras DA, Webb R, Allegrucci C, Alberio R, Surani MA (2017) Principles of early human  
17 development and germ cell program from conserved model systems. *Nature* 546: 416-420
- 18 Kunath T, Arnaud D, Uy GD, Okamoto I, Chureau C, Yamanaka Y, Heard E, Gardner RL,  
19 Avner P, Rossant J (2005) Imprinted X-inactivation in extra-embryonic endoderm cell lines from  
20 mouse blastocysts. *Development* 132: 1649-61
- 21 Kwon GS, Viotti M, Hadjantonakis AK (2008) The endoderm of the mouse embryo arises by  
22 dynamic widespread intercalation of embryonic and extraembryonic lineages. *Dev Cell* 15: 509-  
23 20
- 24 Langmead B, Trapnell C, Pop M, Salzberg SL (2009) Ultrafast and memory-efficient alignment  
25 of short DNA sequences to the human genome. *Genome Biol* 10: R25
- 26 Li B, Dewey CN (2011) RSEM: accurate transcript quantification from RNA-Seq data with or  
27 without a reference genome. *BMC bioinformatics* 12: 323
- 28 Lim CY, Tam WL, Zhang J, Ang HS, Jia H, Lipovich L, Ng HH, Wei CL, Sung WK, Robson P,  
29 Yang H, Lim B (2008) Sall4 regulates distinct transcription circuitries in different blastocyst-  
30 derived stem cell lineages. *Cell Stem Cell* 3: 543-54
- 31 Lin J, Khan M, Zapiec B, Mombaerts P (2016) Efficient derivation of extraembryonic endoderm  
32 stem cell lines from mouse postimplantation embryos. *Scientific reports* 6: 39457
- 33 Livak KJ, Schmittgen TD (2001) Analysis of relative gene expression data using real-time  
34 quantitative PCR and the  $2^{-\Delta\Delta C(T)}$  Method. *Methods* 25: 402-8
- 35 Maruyama T, Dougan SK, Truttmann MC, Bilate AM, Ingram JR, Ploegh HL (2015) Increasing  
36 the efficiency of precise genome editing with CRISPR-Cas9 by inhibition of nonhomologous end  
37 joining. *Nat Biotechnol* 33: 538-42
- 38 Masaki H, Kato-Itoh M, Takahashi Y, Umino A, Sato H, Ito K, Yanagida A, Nishimura T,  
39 Yamaguchi T, Hirabayashi M, Era T, Loh KM, Wu SM, Weissman IL, Nakauchi H (2016)

- 1 Inhibition of Apoptosis Overcomes Stage-Related Compatibility Barriers to Chimera Formation  
2 in Mouse Embryos. *Cell Stem Cell* 19: 587-592
- 3 Mascetti VL, Pedersen RA (2016) Contributions of Mammalian Chimeras to Pluripotent Stem  
4 Cell Research. *Cell Stem Cell* 19: 163-175
- 5 Matsunari H, Nagashima H, Watanabe M, Umeyama K, Nakano K, Nagaya M, Kobayashi T,  
6 Yamaguchi T, Sumazaki R, Herzenberg LA, Nakauchi H (2013) Blastocyst complementation  
7 generates exogenic pancreas in vivo in apancreatic cloned pigs. *Proc Natl Acad Sci U S A* 110:  
8 4557-62
- 9 McDonald AC, Biechele S, Rossant J, Stanford WL (2014) Sox17-mediated XEN cell  
10 conversion identifies dynamic networks controlling cell-fate decisions in embryo-derived stem  
11 cells. *Cell reports* 9: 780-93
- 12 Mitsui K, Tokuzawa Y, Itoh H, Segawa K, Murakami M, Takahashi K, Maruyama M, Maeda M,  
13 Yamanaka S (2003) The homeoprotein Nanog is required for maintenance of pluripotency in  
14 mouse epiblast and ES cells. *Cell* 113: 631-42
- 15 Nagashima H, Giannakis C, Ashman RJ, Nottle MB (2004) Sex differentiation and germ cell  
16 production in chimeric pigs produced by inner cell mass injection into blastocysts. *Biol Reprod*  
17 70: 702-7
- 18 Niakan KK, Schrode N, Cho LT, Hadjantonakis AK (2013) Derivation of extraembryonic  
19 endoderm stem (XEN) cells from mouse embryos and embryonic stem cells. *Nat Protoc* 8: 1028-  
20 41
- 21 Park KE, Park CH, Powell A, Martin J, Donovan DM, Telugu BP (2016) Targeted Gene  
22 Knockin in Porcine Somatic Cells Using CRISPR/Cas Ribonucleoproteins. *Int J Mol Sci* 17
- 23 Plusa B, Piliszek A, Frankenberg S, Artus J, Hadjantonakis AK (2008) Distinct sequential cell  
24 behaviours direct primitive endoderm formation in the mouse blastocyst. *Development* 135:  
25 3081-91
- 26 Prokhorova TA, Harkness LM, Frandsen U, Ditzel N, Schroder HD, Burns JS, Kassem M (2009)  
27 Teratoma formation by human embryonic stem cells is site dependent and enhanced by the  
28 presence of Matrigel. *Stem Cells Dev* 18: 47-54
- 29 Ramos-Ibeas P, Nichols J, Alberio R (2018) States and Origins of Mammalian Embryonic  
30 Pluripotency In Vivo and in a Dish. *Current topics in developmental biology* 128: 151-179
- 31 Rashid T, Kobayashi T, Nakauchi H (2014) Revisiting the flight of Icarus: making human organs  
32 from PSCs with large animal chimeras. *Cell Stem Cell* 15: 406-409
- 33 Rossant J (2008) Stem cells and early lineage development. *Cell* 132: 527-31
- 34 Rugg-Gunn PJ, Cox BJ, Ralston A, Rossant J (2010) Distinct histone modifications in stem cell  
35 lines and tissue lineages from the early mouse embryo. *Proc Natl Acad Sci U S A* 107: 10783-90
- 36 Seguin CA, Draper JS, Nagy A, Rossant J (2008) Establishment of endoderm progenitors by  
37 SOX transcription factor expression in human embryonic stem cells. *Cell Stem Cell* 3: 182-95
- 38 Sheets TP, Park KE, Park CH, Swift SM, Powell A, Donovan DM, Telugu BP (2018) Targeted  
39 Mutation of NGN3 Gene Disrupts Pancreatic Endocrine Cell Development in Pigs. *Scientific*  
40 *reports* 8: 3582

- 1 Shen QY, Yu S, Zhang Y, Zhou Z, Zhu ZS, Pan Q, Lv S, Niu HM, Li N, Peng S, Liao MZ,  
2 Wang HY, Lei AM, Miao YL, Liu ZH, Hua JL (2019) Characterization of porcine  
3 extraembryonic endoderm cells. *Cell Prolif* 52: e12591
- 4 Song JS, Liu X, Liu XS, He X (2008) A high-resolution map of nucleosome positioning on a  
5 fission yeast centromere. *Genome research* 18: 1064-72
- 6 Telugu BP, Ezashi T, Roberts RM (2010) The promise of stem cell research in pigs and other  
7 ungulate species. *Stem Cell Rev* 6: 31-41
- 8 Wamaitha SE, del Valle I, Cho LT, Wei Y, Fogarty NM, Blakeley P, Sherwood RI, Ji H, Niakan  
9 KK (2015) Gata6 potently initiates reprogramming of pluripotent and differentiated cells to  
10 extraembryonic endoderm stem cells. *Genes Dev* 29: 1239-55
- 11 Watanabe K, Ueno M, Kamiya D, Nishiyama A, Matsumura M, Wataya T, Takahashi JB,  
12 Nishikawa S, Nishikawa S, Muguruma K, Sasai Y (2007) A ROCK inhibitor permits survival of  
13 dissociated human embryonic stem cells. *Nat Biotechnol* 25: 681-6
- 14 West FD, Terlouw SL, Kwon DJ, Mumaw JL, Dhara SK, Hasneen K, Dobrinsky JR, Stice SL  
15 (2010) Porcine induced pluripotent stem cells produce chimeric offspring. *Stem Cells Dev* 19:  
16 1211-20
- 17 Wu J, Platero-Luengo A, Sakurai M, Sugawara A, Gil MA, Yamauchi T, Suzuki K, Bogliotti YS,  
18 Cuello C, Morales Valencia M *et al* (2017) Interspecies Chimerism with Mammalian Pluripotent  
19 Stem Cells. *Cell* 168: 473-486 e15
- 20 Xue B, Li Y, He Y, Wei R, Sun R, Yin Z, Bou G, Liu Z (2016) Porcine Pluripotent Stem Cells  
21 Derived from IVF Embryos Contribute to Chimeric Development In Vivo. *PLoS ONE* 11:  
22 e0151737
- 23 Zhao Y, Zhao T, Guan J, Zhang X, Fu Y, Ye J, Zhu J, Meng G, Ge J, Yang S, Cheng L, Du Y,  
24 Zhao C, Wang T, Su L, Yang W, Deng H (2015) A XEN-like State Bridges Somatic Cells to  
25 Pluripotency during Chemical Reprogramming. *Cell* 163: 1678-91
- 26 Zhong Y, Choi T, Kim M, Jung KH, Chai YG, Binas B (2018) Isolation of primitive mouse  
27 extraembryonic endoderm (pXEN) stem cell lines. *Stem cell research* 30: 100-112
- 28



1 **Figure legends**

2 **Figure 1. Distinct subpopulations arise from the porcine blastocyst outgrowths.**

- 3 (a) Phase contrast images depicting morphologies of embryonic outgrowths from days 2  
4 to 5 in culture. In the figure EPI, TE and PrE stands for epiblast, trophectoderm and  
5 primitive endoderm, respectively.
- 6 (b) Immunostaining for key transcription factors, SOX2 and NANOG (ICM), CDX2 and  
7 CK18 (TE), and GATA6 (PrE) in the primary outgrowth at day 3 after explants.
- 8 (c) Representative immunofluorescence images of late blastocyst (ICM in dotted circle).  
9 In the figure, fraction of cells and percentage of cells that stained positive for NANOG or  
10 SOX2 was shown.
- 11 (d) The bar graph showing the attachment and outgrowth rates of early and late  
12 blastocysts.
- 13 (e) Frequencies of SOX2- and GATA6-positive cells in outgrowths. N/D: not detected.
- 14 (f) Representative immunostaining (top) and quantitation (bottom) of the number of  
15 NANOG or GATA4 positive nuclei in primary outgrowths cultured for 7 days. Open and  
16 solid arrows indicate NANOG/GATA4 co- positive and GATA4 positive only cells,  
17 respectively.
- 18 (g) Representative fluorescence images of CK18 and GATA4 of a Day 7 primary  
19 outgrowth (right). Comparison of the transcriptional levels of selected lineage marker  
20 genes between PrE cells and EPI cells by qPCR; \*,  $p < 0.05$  according to unpaired *t* test;  
21 error bars represent  $\pm$  SEM ( $n=3$ ) (left). ACTB was used as an endogenous control.
- 22 (h) The expression of H3K27me3 and SALL4 in day 7 primary outgrowth (right). Inset  
23 shows the zoom-in of the dashed box. The bar graph showing the quantitation of the



1 percentage of H3K27me3 focal dots in SALL4 positive or negative cells (left). In all  
2 images, nuclei were counterstained with DAPI (blue). Scale bar: 100 $\mu$ m.  
3 (i) The relative XIST mRNA levels in PrE cells compared to EPI cells; \*,  $p < 0.05$   
4 according to unpaired  $t$  test; error bars represent  $\pm$  SEM (n=3). ACTB was used as a  
5 loading control.

6

## 7 **Figure 2. Establishment and characterization of pXEN cells**

8 (a) Representative bright-field images of EPI- derived primary colonies, and PrE-derived  
9 XEN cells at passages 3-5.  
10 (b) Efficiency of colony formation of pXEN cells passaged as clumps or single cells. The  
11 colony forming activity were greatly impaired when dissociated as single cells. Cells  
12 were passaged as clumps by mechanical (clumps-me) or enzymatic dissociation  
13 (clumps-en) with Accutase.  
14 (c) Alkaline phosphatase (ALP) staining of an *in vivo*-derived pXEN cells (Xv#9) after  
15 culturing for 3 and 7 days.  
16 (d) Representative fluorescence images of VIMENTIN (red) and AFP (green)  
17 (e) Expression of the indicated markers in pXEN at passages 30-35.  
18 (f) Effect of growth factors supplementation on PrE derivation. pXEN cells were seeded  
19 onto a 6-well-plate seeded containing a density of  $5 \times 10^4$  feeder cells per  $\text{cm}^2$ , and  
20 (g) cell number estimated 48 h following passage. Data are presented as means  $\pm$  s.d.  
21 (n = 3).

- 1 (h) qPCR analyses of total RNA isolated from pXEN cells grown in either the presence  
2 or absence of LIF/bFGF for 4 days. ACTB was used as a loading control. The values  
3 are represented as mean  $\pm$  s.d. (n = 3).
- 4 (i) Representative images of pXEN cells show the expression of stem cell marker,  
5 SALL4 (green) that are significantly reduced in the cells that had lost lipid droplet. Scale  
6 bar: 100 $\mu$ m.
- 7 (j) qPCR analysis of pXEN cells derived from different embryonic origins. ACTB was  
8 used as a loading control. The values are represented as mean  $\pm$  s.d. (n = 3).
- 9 (k) Representative karyotypic analysis of pXEN cell lines, with numbered chromosomes.
- 10 (l) RNA-seq analysis of pXEN cells and comparison with analogous derivatives. Data  
11 from pig XEN cell lines as well as published data on related cell lines (mouse and rat  
12 XEN cells) were included in the comparison. Principal component analysis (PCA) plot of  
13 two pXEN cells and other samples. Upper inset shows the color code for each cell type,  
14 lower inset shows a separate PCA of only pig vs. mouse vs. rat XEN cells.
- 15 (m) hierarchical clustering of pXEN and related samples.
- 16 (n) Heatmap comparison of selected XEN-associated extraembryonic endodermal (ExEn)  
17 marker gene expression of all samples.

18

19 **Figure 3. Chimeric contribution of pXEN cells to embryonic and extraembryonic**  
20 **lineages in post-implantation Day 21 embryos.**

- 21 (a) Schematic representation of the chimera assay.
- 22 (b) Table presents a summary of chimera experiments performed by injection of pXEN  
23 cells into blastocysts. In the Table, Ys: yolk sac; ExE: extraembryonic membranes; N/D:

1 not defined (severely retarded fetuses with no fetal or yolk sac parts); and “\*\*” stands for  
2 the embryos at the pre-attachment stages (spherical or ovoid).

3 (c) Representative bright field and fluorescence merged images of normal (XeC#2-3  
4 and XeC#2-4) and retarded (XeC#2-6) fetuses at day 21 of gestation. Yolk sac outlined  
5 by the dashed line, and enlarged view of the region marked by the dashed box is shown  
6 in the right. In the figure Al stands for allantois; Ch, chorion; Emb, embryo; Ys, yolk sac.

7 (d) Bar graph representing percent contributions of GFP-XEN in chimeras determined  
8 by qPCR; \*,  $p < 0.05$  according to unpaired *t* test; error bars represent  $\pm$  SEM ( $n=3$ ).

9 (e) Representative sagittal or transverse sections of fetuses showing dual  
10 immunofluorescence staining for GFP (green) and SALL4 or PECAM1 (red) in embryos;  
11 the arrows indicate GFP-positive cells derived from injected pXEN cells in sections.  
12 Inset are zoom-in magnified images of the dashed box. Nuclei were stained with DAPI  
13 (blue). Al, allantois; Ch, chorion; Emb, embryo; Lp, liver primordium; Pg primitive gut; Ys,  
14 yolk sac; Am, amnion; Hp, heart primordium; So, somite. Scale bar: 100 $\mu$ m.

15

#### 16 **Figure 4. Generation of viable cloned piglets using pXEN or fibroblasts**

17 (a) Summary of SCNT experiments. <sup>#</sup>Cloning efficiency was obtained by calculating  
18 total no. fetuses or piglets / total no. embryos transferred. <sup>\$</sup>data obtained from our  
19 previous study. <sup>\*</sup>NGN3<sup>-/-</sup> cells originated from our previous report<sup>25</sup>. All the fetal  
20 fibroblasts and pXEN cells with the exception of NGN3<sup>-/-</sup> cells used as SCNT donors  
21 were derived from the same fetus (female Ossabow fetal fibroblast #6).

22 (b) Representative images showing 10 days old NGN3 KO white (outbred)- and XEN  
23 Black (Ossabow)-coated littermates. The fluorescence images of live GFP+ piglets and

1 whole organs taken with blue light illumination showing ubiquitous expression of GFP  
2 transgene, and confirming the pXEN cell as nuclear donors.  
3 (c) A representative digital gel image of the 1.2-kb amplicon with primers within and  
4 outside of the targeting vector confirming site-specific knockin was generated by  
5 Fragment Analyzer.  
6

1 **Figure 1**

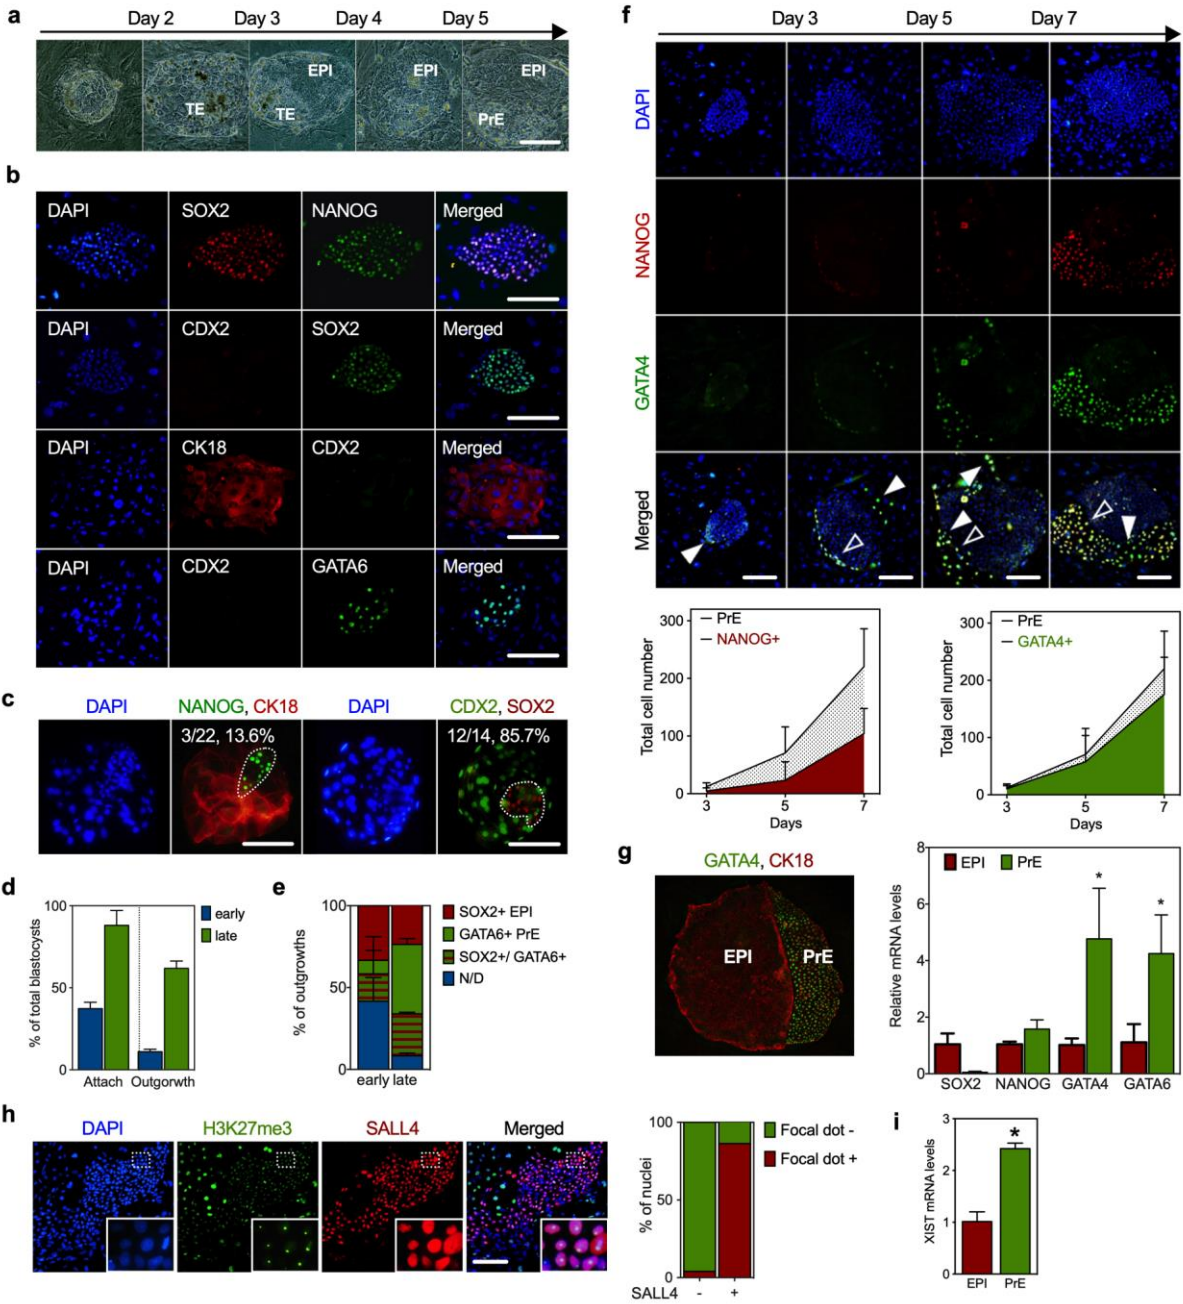

2  
3

# 1 Figure 2

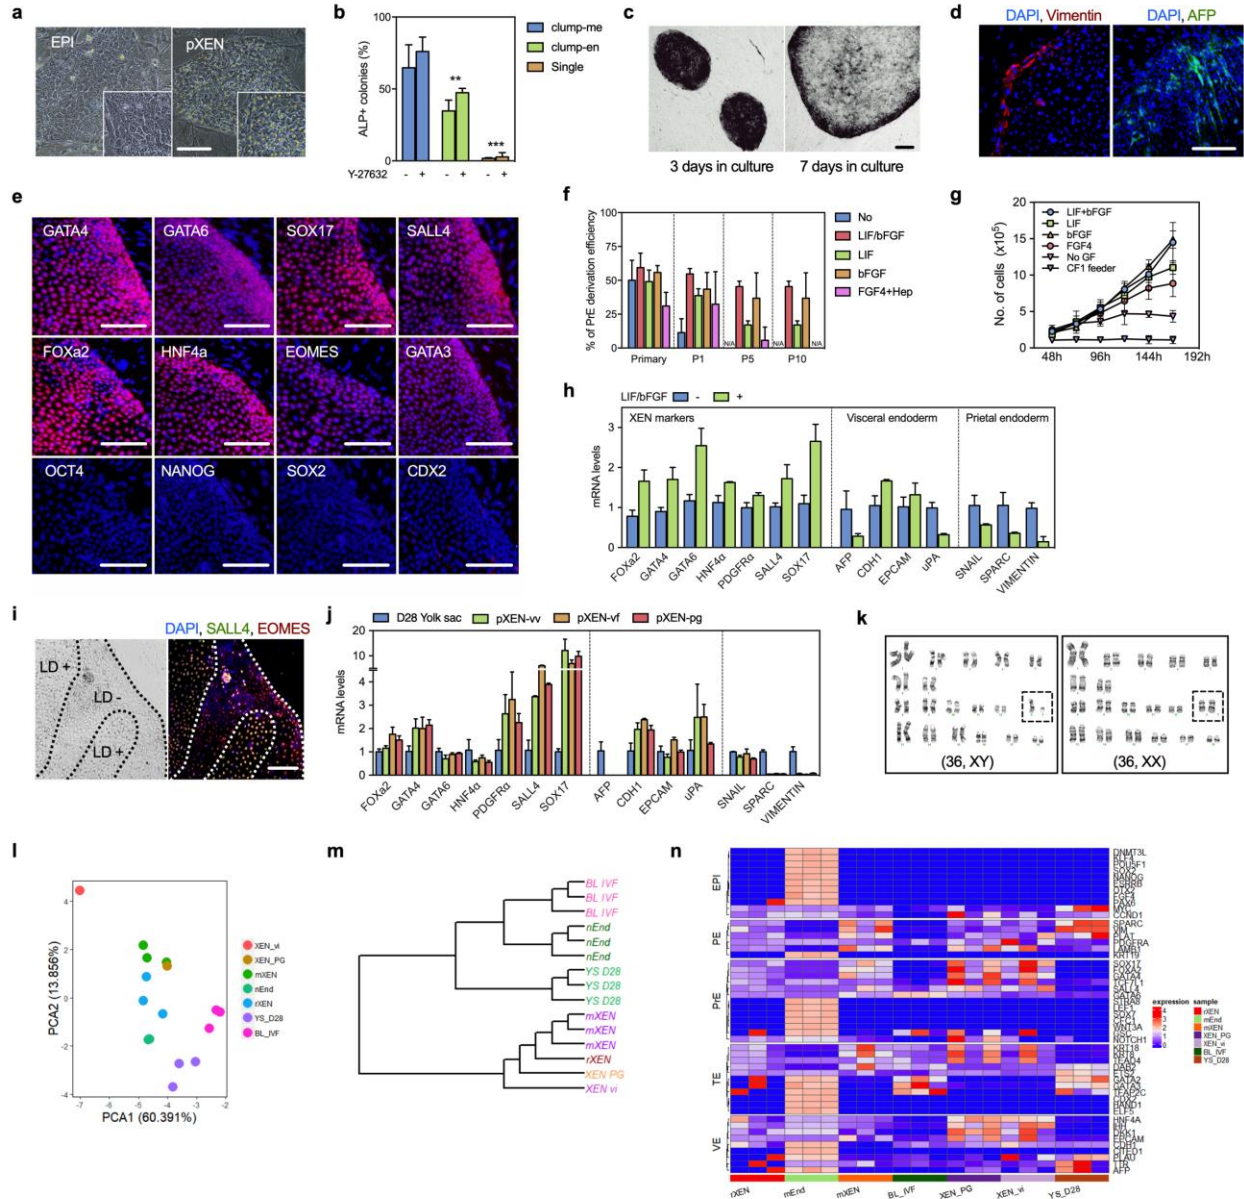

2  
3



1 **Figure 3**

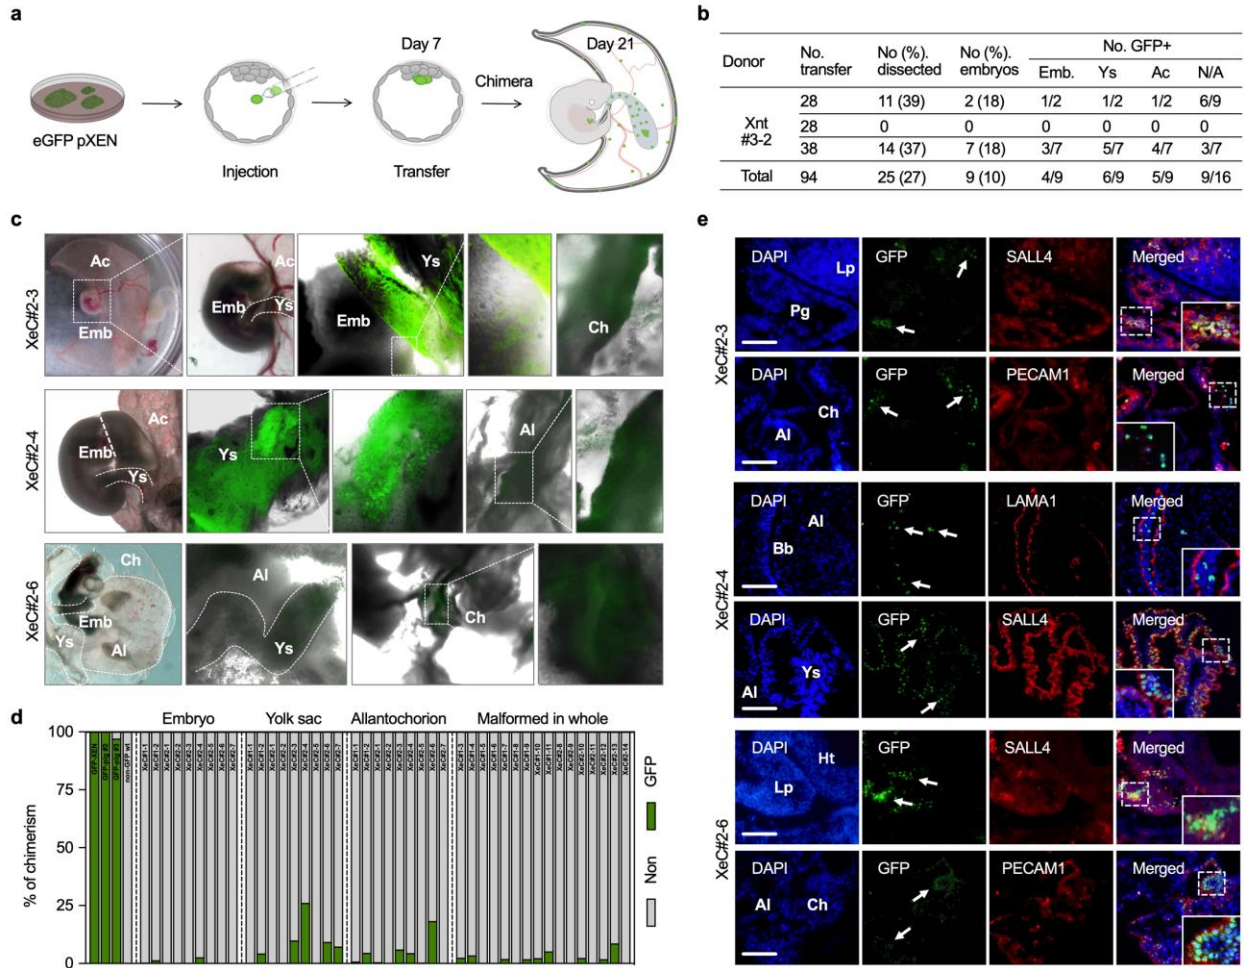

2  
3

1 **Figure 4**



2
